# Supplementary material for: Expression of cPLA2γ mRNA and protein differs the response of PBMC from severe and non-severe asthmatics to bacterial lipopolysaccharide and house dust mite allergen
Source: PubMed Central journal article supplement — Int J Immunopathol Pharmacol. 2021 Feb 24;35:2058738421990952. doi: 10.1177/2058738421990952 (PMC7925951; doi:10.1177/2058738421990952), 2021-02-24
Supplement: sj-pdf-1-iji-10.1177_2058738421990952.pdf [file sj-pdf-1-iji-10.1177_2058738421990952.pdf]

**PROJECT: Environmental factors as modifiers of the expression of genes involved in the pathogenesis of bronchial asthma**

*Please indicate the correct answer by putting  $\surd$  or x in the correct  or write the correct answer in the dotted box*

*White fields are filled in by a volunteer, gray fields are filled in by a doctor*

|                                                                                                                                                                                                                                                                                                                                                                                  |                                                                           |                                                                              |                                                                                 |                                     |
|----------------------------------------------------------------------------------------------------------------------------------------------------------------------------------------------------------------------------------------------------------------------------------------------------------------------------------------------------------------------------------|---------------------------------------------------------------------------|------------------------------------------------------------------------------|---------------------------------------------------------------------------------|-------------------------------------|
| Date of completing the questionnaire .....                                                                                                                                                                                                                                                                                                                                       |                                                                           | Form no<br>(filled in by the doctor)                                         |                                                                                 |                                     |
| First name .....                                                                                                                                                                                                                                                                                                                                                                 |                                                                           | Last name .....                                                              |                                                                                 | Birth date .....                    |
| Contact phone number: .....                                                                                                                                                                                                                                                                                                                                                      |                                                                           |                                                                              |                                                                                 |                                     |
| Contact address.....                                                                                                                                                                                                                                                                                                                                                             |                                                                           |                                                                              |                                                                                 |                                     |
| Sex<br><b>W</b> <input type="checkbox"/> / <b>M</b> <input type="checkbox"/>                                                                                                                                                                                                                                                                                                     | Age<br>.....                                                              | sex<br><b>W</b> <input type="checkbox"/> / <b>M</b> <input type="checkbox"/> | Age<br>.....                                                                    | BMI.....                            |
| Do you smoke cigarettes or other tobacco?<br><input type="checkbox"/> YES, from ..... years, around .....cigarettes a day<br><input type="checkbox"/> I have smoked in the past (period of abstinence minimum 6 months)<br>..... years, around .....cigarettes a day<br><input type="checkbox"/> NO                                                                              |                                                                           |                                                                              |                                                                                 | Pack Years .....                    |
| Has anyone in your family (parents, siblings, grandparents) suffered from asthma or other allergic diseases, if so who?<br><input type="checkbox"/> allergic rhinitis .....<br><input type="checkbox"/> has diagnosed nasal polyps .....<br><input type="checkbox"/> allergic conjunctivitis .....<br>Atopic dermatitis who .....<br>Other allergic diseases, such as ..... who? |                                                                           |                                                                              |                                                                                 |                                     |
| <b>Thank you, the rest of the section is to be completed only by the doctor</b>                                                                                                                                                                                                                                                                                                  |                                                                           |                                                                              |                                                                                 |                                     |
| Performed tests (completed by the doctor):                                                                                                                                                                                                                                                                                                                                       |                                                                           |                                                                              | <input type="checkbox"/> a sample for genetic tests (3 tubes and 9 ml for EDTA) |                                     |
| <input type="checkbox"/> morphology                                                                                                                                                                                                                                                                                                                                              | <input type="checkbox"/> CRP                                              | <input type="checkbox"/> morphology                                          | <input type="checkbox"/> CRP                                                    | <input type="checkbox"/> morphology |
| Study group (to be completed by a doctor):                                                                                                                                                                                                                                                                                                                                       |                                                                           |                                                                              |                                                                                 |                                     |
| <input type="checkbox"/> Severe asthma                                                                                                                                                                                                                                                                                                                                           | <input type="checkbox"/> Severe asthma OMA                                | <input type="checkbox"/> Severe asthma                                       | <input type="checkbox"/> Severe asthma OMA                                      |                                     |
| FEV1 resting                                                                                                                                                                                                                                                                                                                                                                     | <input type="checkbox"/> $\geq 65\%$<br><input type="checkbox"/> $< 65\%$ | FEV1 resting                                                                 | <input type="checkbox"/> $\geq 65\%$<br><input type="checkbox"/> $< 65\%$       |                                     |
| Asthma beginning                                                                                                                                                                                                                                                                                                                                                                 | <input type="checkbox"/> $< 40$ y                                         | Asthma beginning                                                             | <input type="checkbox"/> $< 40$ y                                               |                                     |
|                                                                                                                                                                                                                                                                                                                                                                                  |                                                                           |                                                                              |                                                                                 |                                     |

***To be completed only by asthma patients***

**PROJECT: Environmental factors as modifiers of the expression of genes involved in the pathogenesis of bronchial asthma**

|                                     |                                                                                                                                                                                      |                                            |                                       |
|-------------------------------------|--------------------------------------------------------------------------------------------------------------------------------------------------------------------------------------|--------------------------------------------|---------------------------------------|
| 1.                                  | At what age did asthma symptoms appear (wheezing, shortness of breath, cough)                                                                                                        |                                            |                                       |
|                                     | <input type="checkbox"/> <3 y<br><input type="checkbox"/> 3-7 y<br><input type="checkbox"/> 7-16 y<br><input type="checkbox"/> 16-40 y<br><input type="checkbox"/> > 40 y            |                                            |                                       |
| 2.                                  | The year of asthma recognition (by the doctor):.....                                                                                                                                 |                                            |                                       |
| 3.                                  | Since when asthma is severe (persistent symptoms despite treatment, frequent exacerbations, oral or intravenous steroids, hospitalization)<br>year..... <input type="checkbox"/> n/a |                                            |                                       |
| 4.                                  | In the last 4 weeks:                                                                                                                                                                 | YES                                        | NO                                    |
| 1)                                  | Have asthma symptoms cough, shortness of breath, wheezing, tightness in the chest (at least one symptom) more than 2 weeks?                                                          | <input type="checkbox"/>                   | <input type="checkbox"/>              |
| 2)                                  | Was there any restriction in daily activities due to asthma?                                                                                                                         | <input type="checkbox"/>                   | <input type="checkbox"/>              |
| 3)                                  | Did you experience asthma symptoms at night: cough, shortness of breath, wheezing, chest tightness (at least one of the symptoms)?                                                   | <input type="checkbox"/>                   | <input type="checkbox"/>              |
| 4)                                  | Due to asthma symptoms did the patient use a reliever medication (SABA) more than twice a week?                                                                                      | <input type="checkbox"/>                   | <input type="checkbox"/>              |
| 5)                                  | is the PEF or FEV1 value <80% of the predicted or maximum personal best score?                                                                                                       | <input type="checkbox"/>                   | <input type="checkbox"/>              |
| Asthma control according to GINA    |                                                                                                                                                                                      |                                            |                                       |
| <input type="checkbox"/> controlled |                                                                                                                                                                                      | <input type="checkbox"/> partly controlled | <input type="checkbox"/> uncontrolled |

**PROJECT: Environmental factors as modifiers of the expression of genes involved in the pathogenesis of bronchial asthma**

| 5                                          | <p>Have there been severe exacerbations in the last year (requiring the use of oral or intravenous steroids, ambulance service, help at the Emergency Department or Emergency Room or hospitalization)?</p> <p><input type="checkbox"/> There hasn't been in the last year</p> <p><input type="checkbox"/> There was 1</p> <p><input type="checkbox"/> There were 2</p> <p><input type="checkbox"/> There have been 3 or more in the last year He is now</p>                                                                                                                                                                                                                                                                                                                           |             |      |             |          |                    |       |          |                    |       |          |                    |       |          |                    |       |          |                    |       |          |                    |       |
|--------------------------------------------|----------------------------------------------------------------------------------------------------------------------------------------------------------------------------------------------------------------------------------------------------------------------------------------------------------------------------------------------------------------------------------------------------------------------------------------------------------------------------------------------------------------------------------------------------------------------------------------------------------------------------------------------------------------------------------------------------------------------------------------------------------------------------------------|-------------|------|-------------|----------|--------------------|-------|----------|--------------------|-------|----------|--------------------|-------|----------|--------------------|-------|----------|--------------------|-------|----------|--------------------|-------|
| <i>If there were severe exacerbations:</i> |                                                                                                                                                                                                                                                                                                                                                                                                                                                                                                                                                                                                                                                                                                                                                                                        |             |      |             |          |                    |       |          |                    |       |          |                    |       |          |                    |       |          |                    |       |          |                    |       |
| 5a.                                        | <p>How many times during the last year was emergency medical help required (PR, A&amp;E, IP, visit to the clinic with intravenous / intramuscular / nebulized drugs, hospitalization)? (give me a number):.....</p>                                                                                                                                                                                                                                                                                                                                                                                                                                                                                                                                                                    |             |      |             |          |                    |       |          |                    |       |          |                    |       |          |                    |       |          |                    |       |          |                    |       |
| 5b.                                        | <p>Number of additional unplanned medical visits in the last year (please enter the number): .....</p>                                                                                                                                                                                                                                                                                                                                                                                                                                                                                                                                                                                                                                                                                 |             |      |             |          |                    |       |          |                    |       |          |                    |       |          |                    |       |          |                    |       |          |                    |       |
| 5c.                                        | <p>Number of hospitalizations in the last year (provide the number): .....</p>                                                                                                                                                                                                                                                                                                                                                                                                                                                                                                                                                                                                                                                                                                         |             |      |             |          |                    |       |          |                    |       |          |                    |       |          |                    |       |          |                    |       |          |                    |       |
| 5d.                                        | <p>Have you had a life-threatening asthmatic incident in the past (need for intubation, adrenaline use, loss of consciousness during an asthma attack due to breathlessness)?</p> <p><input type="checkbox"/> NO      <input type="checkbox"/> YES</p>                                                                                                                                                                                                                                                                                                                                                                                                                                                                                                                                 |             |      |             |          |                    |       |          |                    |       |          |                    |       |          |                    |       |          |                    |       |          |                    |       |
| .5.                                        | <p>Please list all your CURRENT asthma medications - inhaled and oral</p> <table border="0" style="width: 100%; border-collapse: collapse;"> <thead> <tr> <th style="text-align: left;">Drug name</th> <th style="text-align: left;">Dose</th> <th style="text-align: left;">Times a day</th> </tr> </thead> <tbody> <tr> <td>1) .....</td> <td>..... mcg/mg/g/amp</td> <td>.....</td> </tr> <tr> <td>2) .....</td> <td>..... mcg/mg/g/amp</td> <td>.....</td> </tr> <tr> <td>3) .....</td> <td>..... mcg/mg/g/amp</td> <td>.....</td> </tr> <tr> <td>4) .....</td> <td>..... mcg/mg/g/amp</td> <td>.....</td> </tr> <tr> <td>5) .....</td> <td>..... mcg/mg/g/amp</td> <td>.....</td> </tr> <tr> <td>6) .....</td> <td>..... mcg/mg/g/amp</td> <td>.....</td> </tr> </tbody> </table> | Drug name   | Dose | Times a day | 1) ..... | ..... mcg/mg/g/amp | ..... | 2) ..... | ..... mcg/mg/g/amp | ..... | 3) ..... | ..... mcg/mg/g/amp | ..... | 4) ..... | ..... mcg/mg/g/amp | ..... | 5) ..... | ..... mcg/mg/g/amp | ..... | 6) ..... | ..... mcg/mg/g/amp | ..... |
| Drug name                                  | Dose                                                                                                                                                                                                                                                                                                                                                                                                                                                                                                                                                                                                                                                                                                                                                                                   | Times a day |      |             |          |                    |       |          |                    |       |          |                    |       |          |                    |       |          |                    |       |          |                    |       |
| 1) .....                                   | ..... mcg/mg/g/amp                                                                                                                                                                                                                                                                                                                                                                                                                                                                                                                                                                                                                                                                                                                                                                     | .....       |      |             |          |                    |       |          |                    |       |          |                    |       |          |                    |       |          |                    |       |          |                    |       |
| 2) .....                                   | ..... mcg/mg/g/amp                                                                                                                                                                                                                                                                                                                                                                                                                                                                                                                                                                                                                                                                                                                                                                     | .....       |      |             |          |                    |       |          |                    |       |          |                    |       |          |                    |       |          |                    |       |          |                    |       |
| 3) .....                                   | ..... mcg/mg/g/amp                                                                                                                                                                                                                                                                                                                                                                                                                                                                                                                                                                                                                                                                                                                                                                     | .....       |      |             |          |                    |       |          |                    |       |          |                    |       |          |                    |       |          |                    |       |          |                    |       |
| 4) .....                                   | ..... mcg/mg/g/amp                                                                                                                                                                                                                                                                                                                                                                                                                                                                                                                                                                                                                                                                                                                                                                     | .....       |      |             |          |                    |       |          |                    |       |          |                    |       |          |                    |       |          |                    |       |          |                    |       |
| 5) .....                                   | ..... mcg/mg/g/amp                                                                                                                                                                                                                                                                                                                                                                                                                                                                                                                                                                                                                                                                                                                                                                     | .....       |      |             |          |                    |       |          |                    |       |          |                    |       |          |                    |       |          |                    |       |          |                    |       |
| 6) .....                                   | ..... mcg/mg/g/amp                                                                                                                                                                                                                                                                                                                                                                                                                                                                                                                                                                                                                                                                                                                                                                     | .....       |      |             |          |                    |       |          |                    |       |          |                    |       |          |                    |       |          |                    |       |          |                    |       |
| 6.                                         | <p>Has the patient been using systemic glucocorticosteroids chronically in the last 3 months (or was it necessary to use them for most days in the period in question)?</p> <p><input type="checkbox"/> NO    <input type="checkbox"/> YES, <i>dose of prednisone calculaiton</i> .....mg</p>                                                                                                                                                                                                                                                                                                                                                                                                                                                                                          |             |      |             |          |                    |       |          |                    |       |          |                    |       |          |                    |       |          |                    |       |          |                    |       |

**PROJECT: Environmental factors as modifiers of the expression of genes involved in the pathogenesis of bronchial asthma**

|                                       |                                                                                                                                                                                                                                                                            |                                   |  |                                   |                          |                          |
|---------------------------------------|----------------------------------------------------------------------------------------------------------------------------------------------------------------------------------------------------------------------------------------------------------------------------|-----------------------------------|--|-----------------------------------|--------------------------|--------------------------|
| 7.                                    | Does the patient take inhaled glucocorticoids as a single component or a combined drug for maintenance treatment?<br><input type="checkbox"/> NO <input type="checkbox"/> YES, a dose of BDP-CFC calculaiton/day .....mcg/mg                                               |                                   |  |                                   |                          |                          |
| 8                                     | Is the patient taking LABA (ultraLABA) maintenance therapy as a single component or a combination drug?<br><input type="checkbox"/> NO <input type="checkbox"/> YES <input type="checkbox"/> formoterol <input type="checkbox"/> salmeterol <input type="checkbox"/> other |                                   |  |                                   |                          |                          |
| 9                                     | Is the patient taking SAMA or LAMA?<br><input type="checkbox"/> NO <input type="checkbox"/> YES, <input type="checkbox"/> ipratropium <input type="checkbox"/> tiotropium <input type="checkbox"/> other                                                                   |                                   |  |                                   |                          |                          |
| 10                                    | Is the patient taking anti-leukotriene drugs?<br><input type="checkbox"/> NO <input type="checkbox"/> YES <input type="checkbox"/> montelukast <input type="checkbox"/> zafirlukast <input type="checkbox"/> other                                                         |                                   |  |                                   |                          |                          |
| 11.                                   | Is the patient taking anti IgE?<br><input type="checkbox"/> NO <input type="checkbox"/> YES the month dose .....mg                                                                                                                                                         |                                   |  |                                   |                          |                          |
| Treatment intensity according to GINA |                                                                                                                                                                                                                                                                            |                                   |  |                                   |                          |                          |
| <input type="checkbox"/> 1 degree     |                                                                                                                                                                                                                                                                            | <input type="checkbox"/> 2 degree |  | <input type="checkbox"/> 3 degree |                          |                          |
| <input type="checkbox"/> 4 degree     |                                                                                                                                                                                                                                                                            | <input type="checkbox"/> 5 degree |  |                                   |                          |                          |
| 12.                                   | Do you suffer from                                                                                                                                                                                                                                                         |                                   |  |                                   | YES                      | NO                       |
|                                       | a) for allergic rhinitis                                                                                                                                                                                                                                                   |                                   |  |                                   | <input type="checkbox"/> | <input type="checkbox"/> |
|                                       | b) has nasal polyps                                                                                                                                                                                                                                                        |                                   |  |                                   | <input type="checkbox"/> | <input type="checkbox"/> |
|                                       | c) allergic conjunctivitis                                                                                                                                                                                                                                                 |                                   |  |                                   | <input type="checkbox"/> | <input type="checkbox"/> |
|                                       | d) atopic dermatitis e) other allergic diseases                                                                                                                                                                                                                            |                                   |  |                                   | <input type="checkbox"/> | <input type="checkbox"/> |
|                                       | others.....                                                                                                                                                                                                                                                                |                                   |  |                                   | <input type="checkbox"/> | <input type="checkbox"/> |

**PROJECT: Environmental factors as modifiers of the expression of genes involved in the pathogenesis of bronchial asthma**

|     |                                                                                                                                                                                                                                                                                                                                                                                                                                                                                                                                                                                                                                                                                                                                                                                                                                                        |
|-----|--------------------------------------------------------------------------------------------------------------------------------------------------------------------------------------------------------------------------------------------------------------------------------------------------------------------------------------------------------------------------------------------------------------------------------------------------------------------------------------------------------------------------------------------------------------------------------------------------------------------------------------------------------------------------------------------------------------------------------------------------------------------------------------------------------------------------------------------------------|
| 13. | <p>Have you ever experienced any side effects after taking painkillers / anti-inflammatory / antipyretic drugs, e.g. aspirin?</p> <p><input type="checkbox"/> NO      <input type="checkbox"/> YES,      <input type="checkbox"/> I am not sure</p> <p><i>if yes:</i></p> <p>a) after which drug:.....</p> <p>b) what symptoms.....</p> <p>c) after what time of drug.....</p> <p>d) how many times.....</p> <p>e) when the last time .....year</p> <p>f) did the doctor diagnosed hypersensitivity to non-steroidal anti-inflammatory drugs</p> <p><input type="checkbox"/> NO      <input type="checkbox"/> YES,      <input type="checkbox"/> I am not sure</p> <p>g) Was a provocation with this drug performed by a doctor?</p> <p><input type="checkbox"/> NO      <input type="checkbox"/> YES,      <input type="checkbox"/> I am not sure</p> |
|-----|--------------------------------------------------------------------------------------------------------------------------------------------------------------------------------------------------------------------------------------------------------------------------------------------------------------------------------------------------------------------------------------------------------------------------------------------------------------------------------------------------------------------------------------------------------------------------------------------------------------------------------------------------------------------------------------------------------------------------------------------------------------------------------------------------------------------------------------------------------|

**PROJECT: Environmental factors as modifiers of the expression of genes involved in the pathogenesis of bronchial asthma**

**Asthma Control Test**

1) 1) Over the past 4 weeks, how often did your asthma stop you from performing your usual activities at work, at school, university or at home?

- Always (1)
- Very common (2)
- Sometimes (3)
- Rare (4)
- No

2) 2) How often in the last 4 weeks have you felt short of breath?

- More than once a day (1)
- Once a day (2)
- 3 to 6 times a week (3)
- Once or twice a week (4)
- No (5)

3) How often in the last 4 weeks have you been waking up earlier than usual during the night or morning due to asthma-related symptoms (such as wheezing, coughing, shortness of breath, chest tightness or pain) ?

- 4 nights a week or more (1)
- 2 to 3 nights a week (2)
- Once a week (3)
- One or two (4)
- No (5) 4)

4) How often have you used your fast-acting 'reliever inhaler' in the last 4 weeks?

- 3 times a day or more (1)
- 1 or 2 times a day (2)
- 2 or 3 times a week (3)
- Once a week or less (4)
- No (5)

5) How would you rate your asthma control over the past 4 weeks?

- Not controlled at all (1)
- Lately controlled (2)
- Moderately controlled (3)
- Well controlled (4)
- Fully controlled (5)

**PROJECT: Environmental factors as modifiers of the expression of genes involved in the pathogenesis of bronchial asthma**

|     |                                                                                                                                                                                                                                             |
|-----|---------------------------------------------------------------------------------------------------------------------------------------------------------------------------------------------------------------------------------------------|
| 15. | Result of the test:<br><input type="checkbox"/> 25 points - asthma is fully controlled<br><input type="checkbox"/> 20 - 24 points - asthma is well controlled<br><input type="checkbox"/> $\leq 19$ points - inadequately controlled asthma |
|-----|---------------------------------------------------------------------------------------------------------------------------------------------------------------------------------------------------------------------------------------------|

**PROJECT: Environmental factors as modifiers of the expression of genes involved in the pathogenesis of bronchial asthma**

*Thank you, the rest of the section is to be completed only by the doctor*

| Wyniki badań dodatkowych alergologicznych |                                                                                                                                                                                                                                                                                                                                                            |                          |                          |                          |
|-------------------------------------------|------------------------------------------------------------------------------------------------------------------------------------------------------------------------------------------------------------------------------------------------------------------------------------------------------------------------------------------------------------|--------------------------|--------------------------|--------------------------|
| 16.                                       | Skin prick tests:<br><input type="checkbox"/> the study was performed during the visit.<br><input type="checkbox"/> the historical result<br><input type="checkbox"/> positive, including house dust mite from RodzDer.p<br><input type="checkbox"/> positive but negative for house dust mites from RodzDer.p<br><input type="checkbox"/> negative result |                          |                          |                          |
| 17.                                       | Detailed test results:                                                                                                                                                                                                                                                                                                                                     | positive                 | negative                 | not done                 |
|                                           | House dust mites Der.p                                                                                                                                                                                                                                                                                                                                     | <input type="checkbox"/> | <input type="checkbox"/> | <input type="checkbox"/> |
|                                           | House dust mites Der.f                                                                                                                                                                                                                                                                                                                                     | <input type="checkbox"/> | <input type="checkbox"/> | <input type="checkbox"/> |
|                                           | Pantry mites                                                                                                                                                                                                                                                                                                                                               | <input type="checkbox"/> | <input type="checkbox"/> | <input type="checkbox"/> |
|                                           | Grasses                                                                                                                                                                                                                                                                                                                                                    | <input type="checkbox"/> | <input type="checkbox"/> | <input type="checkbox"/> |
|                                           | Rye                                                                                                                                                                                                                                                                                                                                                        | <input type="checkbox"/> | <input type="checkbox"/> | <input type="checkbox"/> |
|                                           | Birch                                                                                                                                                                                                                                                                                                                                                      | <input type="checkbox"/> | <input type="checkbox"/> | <input type="checkbox"/> |
|                                           | Hazel                                                                                                                                                                                                                                                                                                                                                      | <input type="checkbox"/> | <input type="checkbox"/> | <input type="checkbox"/> |
|                                           | Alder                                                                                                                                                                                                                                                                                                                                                      | <input type="checkbox"/> | <input type="checkbox"/> | <input type="checkbox"/> |
|                                           | Mugwort                                                                                                                                                                                                                                                                                                                                                    | <input type="checkbox"/> | <input type="checkbox"/> | <input type="checkbox"/> |
|                                           | Cat                                                                                                                                                                                                                                                                                                                                                        | <input type="checkbox"/> | <input type="checkbox"/> | <input type="checkbox"/> |
|                                           | Dog                                                                                                                                                                                                                                                                                                                                                        | <input type="checkbox"/> | <input type="checkbox"/> | <input type="checkbox"/> |
|                                           | <i>Cladosporium</i>                                                                                                                                                                                                                                                                                                                                        | <input type="checkbox"/> | <input type="checkbox"/> | <input type="checkbox"/> |
|                                           | <i>Alternaria</i>                                                                                                                                                                                                                                                                                                                                          | <input type="checkbox"/> | <input type="checkbox"/> | <input type="checkbox"/> |
|                                           | Others.....                                                                                                                                                                                                                                                                                                                                                | <input type="checkbox"/> | <input type="checkbox"/> | <input type="checkbox"/> |
|                                           | .....                                                                                                                                                                                                                                                                                                                                                      | <input type="checkbox"/> | <input type="checkbox"/> | <input type="checkbox"/> |



**PROJECT: Environmental factors as modifiers of the expression of genes involved in the pathogenesis of bronchial asthma**

|                                                                 |                                                                                                                                                                                                                                                                                                                                                                                                                                                                                                                                                                                                                                                                                                                                                                                                                                                                                                                                                                                                                                                                                                                              |
|-----------------------------------------------------------------|------------------------------------------------------------------------------------------------------------------------------------------------------------------------------------------------------------------------------------------------------------------------------------------------------------------------------------------------------------------------------------------------------------------------------------------------------------------------------------------------------------------------------------------------------------------------------------------------------------------------------------------------------------------------------------------------------------------------------------------------------------------------------------------------------------------------------------------------------------------------------------------------------------------------------------------------------------------------------------------------------------------------------------------------------------------------------------------------------------------------------|
| 18.                                                             | <p>Resting spirometry</p> <p><input type="checkbox"/> the examination was performed at the visit    <input type="checkbox"/> historical result, date.....</p> <p>Was the recommended wash-out times of the drugs observed?</p> <p><input type="checkbox"/> YES                      <input type="checkbox"/> NO, comment.....</p> <p>FEV1 [L].....                      FVC [L].....</p> <p>FEV1 [% wn].....                      FVC [%wn]</p> <p>FEV1/FVC.....</p> <p>Diastolic test</p> <p><input type="checkbox"/> the examination was performed at the visit    <input type="checkbox"/> historical result, date.....</p> <p>FEV1 [L].....                      FVC [L].....</p> <p>FEV1 [% wn].....                      FVC [%wn].....</p> <p>Δ FEV1[%].....                      Δ FVC [%].....</p> <p>Δ FEV1 [ml].....                      Δ FVC [ml].....</p> <p>FEV1/FVC.....</p> <p>Reversible obstruction    <input type="checkbox"/> YES                      <input type="checkbox"/> NO</p> <p>Diastolic test positive    <input type="checkbox"/> YES                      <input type="checkbox"/> NO</p> |
| <b><i>Dalsza część tylko dla pacjentów chorych na astmę</i></b> |                                                                                                                                                                                                                                                                                                                                                                                                                                                                                                                                                                                                                                                                                                                                                                                                                                                                                                                                                                                                                                                                                                                              |
| 19.                                                             | <p>Has the patient had a total serum IgE test measured?</p> <p><input type="checkbox"/> NO            <input type="checkbox"/> YES            .....IU/ml</p> <p>Has the patient been tested for Der.p. specific IgE?</p> <p><input type="checkbox"/> NO            <input type="checkbox"/> YES            .....IU/ml</p> <p><i>Class</i>            .....</p>                                                                                                                                                                                                                                                                                                                                                                                                                                                                                                                                                                                                                                                                                                                                                               |

**PROJECT: Environmental factors as modifiers of the expression of genes involved in the pathogenesis of bronchial asthma**

|                                                                             |                                                                                                                                                                                                                                                                                                                                                                                                                                                                                                  |
|-----------------------------------------------------------------------------|--------------------------------------------------------------------------------------------------------------------------------------------------------------------------------------------------------------------------------------------------------------------------------------------------------------------------------------------------------------------------------------------------------------------------------------------------------------------------------------------------|
| 20.                                                                         | <p>Diagnosis of bronchial asthma: year of diagnosis .....</p> <p>Recognized on the basis of (select all items that were relevant in this case)</p> <p><input type="checkbox"/> an interview</p> <p><input type="checkbox"/> a pharmacological test</p> <p><input type="checkbox"/> diastolic test</p> <p><input type="checkbox"/> diurnal variability of PEF</p> <p><input type="checkbox"/> bronchial hyperresponsiveness test</p> <p><input type="checkbox"/> other methods, such as .....</p> |
| ATS diagnosis criteria for severe asthma (at least one large and two small) |                                                                                                                                                                                                                                                                                                                                                                                                                                                                                                  |

**PROJECT: Environmental factors as modifiers of the expression of genes involved in the pathogenesis of bronchial asthma**

1) Therapy with permanent or almost permanent ( $\geq 50\%$  of the year) use of oral glucocorticosteroids (high criterion according to ATS 2000)

YES  NO

2) Necessary use of high doses of GCS [ $> 1200 \mu\text{g} / \text{d}$  of budesonide or an equivalent dose of another GCS]; (large criterion according to ATS 2000)

YES  NO

a) Need for additional daily treatment with a controlling medication (e.g. LABA, theophylline or LTRA)

YES  NO

b) Asthma symptoms requiring SABA use every day or almost every day

YES  NO

c) Persistent airway obstruction ( $\text{FEV}_1 < 80\%$  predicted, daily variability in  $\text{PEF} > 20\%$ )

YES  NO

d)  $\geq 1$  visit to the HED / emergency room / emergency room due to asthma

YES  NO

e)  $\geq 3$  per year of oral GCS insertions

YES  NO

f) Immediate deterioration after  $\leq 25\%$  dose reduction of oral or inhaled glucocorticoids

YES  NO

g) A history of a life-threatening asthma attack

YES  NO

21. Does the patient's asthma meet the ATS criteria for severe asthma?

YES  NO

*The end*
