# Supplementary material for: Expression of cPLA2γ mRNA and protein differs the response of PBMC from severe and non-severe asthmatics to bacterial lipopolysaccharide and house dust mite allergen
Source: PubMed Central journal article supplement — Int J Immunopathol Pharmacol. 2021 Feb 24;35:2058738421990952. doi: 10.1177/2058738421990952 (PMC7925951; doi:10.1177/2058738421990952), 2021-02-24
Supplement: sj-pdf-2-iji-10.1177_2058738421990952.pdf [file sj-pdf-2-iji-10.1177_2058738421990952.pdf]

**PROJECT: Environmental factors as modifiers of the expression of genes involved in the pathogenesis of bronchial asthma**

*Please indicate the correct answer by putting  $\surd$  or x in the correct  or write the correct answer in the dotted box*

*White fields are filled in by a volunteer, gray fields are filled in by a doctor*

|                                                                                                                                                                                                                                                                                                                                                                                    |                                                                           |                                      |                                                                                                                                                          |                  |
|------------------------------------------------------------------------------------------------------------------------------------------------------------------------------------------------------------------------------------------------------------------------------------------------------------------------------------------------------------------------------------|---------------------------------------------------------------------------|--------------------------------------|----------------------------------------------------------------------------------------------------------------------------------------------------------|------------------|
| Date of completing the questionnaire .....                                                                                                                                                                                                                                                                                                                                         |                                                                           | Form no<br>(filled in by the doctor) |                                                                                                                                                          |                  |
| First name .....                                                                                                                                                                                                                                                                                                                                                                   | Last name.....<br>.....                                                   |                                      | Birth date. ....                                                                                                                                         |                  |
| Contact phone number: .....                                                                                                                                                                                                                                                                                                                                                        |                                                                           |                                      |                                                                                                                                                          |                  |
| Contact address.....                                                                                                                                                                                                                                                                                                                                                               |                                                                           |                                      |                                                                                                                                                          |                  |
| sex<br>W <input type="checkbox"/> /M <input type="checkbox"/>                                                                                                                                                                                                                                                                                                                      | Age<br>.....                                                              | Weight (kg)<br>.....                 | Height (cm)<br>.....                                                                                                                                     | BMI<br>.....     |
| Do you smoke cigarettes or other tobacco?<br><input type="checkbox"/> YES, from ..... years, around ..... cigarettes a day<br><input type="checkbox"/> I have smoked in the past (period of abstinence minimum 6 months)<br>..... years, around ..... cigarettes a day<br><input type="checkbox"/> NO                                                                              |                                                                           |                                      |                                                                                                                                                          | Pack Years ..... |
| Has anyone in your family (parents, siblings, grandparents) suffered from asthma or other allergic diseases, if so who?<br><input type="checkbox"/> allergic rhinitis .....<br><input type="checkbox"/> has diagnosed nosakto polyps .....<br><input type="checkbox"/> allergic conjunctivitis .....<br>Atopic dermatitis who .....<br>Other allergic diseases, such as ..... who? |                                                                           |                                      |                                                                                                                                                          |                  |
| Performed tests (completed by the doctor):<br><input type="checkbox"/> morphology <input type="checkbox"/> CRP <input type="checkbox"/> resting spirometry                                                                                                                                                                                                                         |                                                                           |                                      | <input type="checkbox"/> a sample for genetic tests (3 tubes and 9 ml for EDTA)                                                                          |                  |
| <input type="checkbox"/> diastolic                                                                                                                                                                                                                                                                                                                                                 |                                                                           | <input type="checkbox"/> skin tests  |                                                                                                                                                          |                  |
| Study group (to be completed by a doctor):                                                                                                                                                                                                                                                                                                                                         |                                                                           |                                      |                                                                                                                                                          |                  |
| <input type="checkbox"/> Severe asthma                                                                                                                                                                                                                                                                                                                                             | <input type="checkbox"/> Severe asthma OMA                                | <input type="checkbox"/> Mild asthma | <input type="checkbox"/> healthy volunteer                                                                                                               |                  |
| FEV1 resting                                                                                                                                                                                                                                                                                                                                                                       | <input type="checkbox"/> $\geq 65\%$<br><input type="checkbox"/> $< 65\%$ | FEV1 after diastole                  | <input type="checkbox"/> $\geq 108\%$<br><input type="checkbox"/> $< 108\%$<br><input type="checkbox"/> $\geq 65\%$<br><input type="checkbox"/> $< 65\%$ |                  |
| Asthma beginning                                                                                                                                                                                                                                                                                                                                                                   | <input type="checkbox"/> $< 40$ y                                         | <input type="checkbox"/> $\geq 40$ y | <input type="checkbox"/> n/a                                                                                                                             |                  |

**PROJECT: Environmental factors as modifiers of the expression of genes involved in the pathogenesis of bronchial asthma**

| Results of additional allergological tests |                                                                                                                                                                                                                                                                                                                                                                                                               |                          |                          |                          |
|--------------------------------------------|---------------------------------------------------------------------------------------------------------------------------------------------------------------------------------------------------------------------------------------------------------------------------------------------------------------------------------------------------------------------------------------------------------------|--------------------------|--------------------------|--------------------------|
| 16.                                        | Skin prick tests:<br><input type="checkbox"/> positive, including house dust mite from RodzDer.p<br><input type="checkbox"/> positive but negative for house dust mites from RodzDer.p<br><input type="checkbox"/> negative result                                                                                                                                                                            |                          |                          |                          |
| 17.                                        | Detailed test results:                                                                                                                                                                                                                                                                                                                                                                                        | positive                 | negative                 | not done                 |
|                                            | House dust mites Der.p                                                                                                                                                                                                                                                                                                                                                                                        | <input type="checkbox"/> | <input type="checkbox"/> | <input type="checkbox"/> |
|                                            | House dust mites Der.f                                                                                                                                                                                                                                                                                                                                                                                        | <input type="checkbox"/> | <input type="checkbox"/> | <input type="checkbox"/> |
|                                            | Pantry mites                                                                                                                                                                                                                                                                                                                                                                                                  | <input type="checkbox"/> | <input type="checkbox"/> | <input type="checkbox"/> |
|                                            | Grasses                                                                                                                                                                                                                                                                                                                                                                                                       | <input type="checkbox"/> | <input type="checkbox"/> | <input type="checkbox"/> |
|                                            | Rye                                                                                                                                                                                                                                                                                                                                                                                                           | <input type="checkbox"/> | <input type="checkbox"/> | <input type="checkbox"/> |
|                                            | Birch                                                                                                                                                                                                                                                                                                                                                                                                         | <input type="checkbox"/> | <input type="checkbox"/> | <input type="checkbox"/> |
|                                            | Hazel                                                                                                                                                                                                                                                                                                                                                                                                         | <input type="checkbox"/> | <input type="checkbox"/> | <input type="checkbox"/> |
|                                            | Alder                                                                                                                                                                                                                                                                                                                                                                                                         | <input type="checkbox"/> | <input type="checkbox"/> | <input type="checkbox"/> |
|                                            | Mugwort                                                                                                                                                                                                                                                                                                                                                                                                       | <input type="checkbox"/> | <input type="checkbox"/> | <input type="checkbox"/> |
|                                            | Cat                                                                                                                                                                                                                                                                                                                                                                                                           | <input type="checkbox"/> | <input type="checkbox"/> | <input type="checkbox"/> |
|                                            | Dog                                                                                                                                                                                                                                                                                                                                                                                                           | <input type="checkbox"/> | <input type="checkbox"/> | <input type="checkbox"/> |
|                                            | <i>Cladosporium</i>                                                                                                                                                                                                                                                                                                                                                                                           | <input type="checkbox"/> | <input type="checkbox"/> | <input type="checkbox"/> |
|                                            | <i>Alternaria</i>                                                                                                                                                                                                                                                                                                                                                                                             | <input type="checkbox"/> | <input type="checkbox"/> | <input type="checkbox"/> |
|                                            | Others.....                                                                                                                                                                                                                                                                                                                                                                                                   | <input type="checkbox"/> | <input type="checkbox"/> | <input type="checkbox"/> |
|                                            | .....                                                                                                                                                                                                                                                                                                                                                                                                         | <input type="checkbox"/> | <input type="checkbox"/> | <input type="checkbox"/> |
| 18.                                        | Resting spirometry<br><input type="checkbox"/> the examination was performed at the visit <input type="checkbox"/> historical result, date.....<br>Was the recommended wash-out times of the drugs observed?<br><input type="checkbox"/> YES <input type="checkbox"/> NO, comment.....<br>FEV1 [L].....                      FVC [L].....<br>FEV1 [% wn].....                      FVC [%wn]<br>FEV1/FVC..... |                          |                          |                          |
| <i>The end</i>                             |                                                                                                                                                                                                                                                                                                                                                                                                               |                          |                          |                          |
